# Supplementary material
Source: publisher site journal article supplement (https://www.dovepress.com/article/492185)
Supplement: Supplementary file 1 [file 17_Feb_2025_Supplementary_material_1.docx]

***Supplementary Material 1 (Method)***

**Liquid chromatograph-mass spectrometer/mass spectrometer (LC-MS/MS) for fat SCFAs**

1. **Reagents and equipment**

Table 1 The list of reagents.

| Name | Specification | Brand | Catalog number |
| --- | --- | --- | --- |
| Acetic Acid | HPLC | Aladdin | A801303-500ml |
| Propionic acid | HPLC | Sigma | 94425-1ML-F |
| Butyric Acid | HPLC | Sigma | 19215-5ML |
| Methanol | HPLC | Fisher | A452-4 |
| Water | HPLC | Wahaha | / |
| Formic acid | HPLC | Fisher | A117-50 |
| Acetonitrile | HPLC | Fisher | A998-4 |
| 3-nitrophenylhydrazine (3-NPH) | HPLC | Sigma | N21804-25g |
| N-(3-Dimethylaminopropyl)-N’-ethylcarbodiimide hydrochloride (EDC) | HPLC | aladdin | E106172-100g |
| Pyridine | HPLC | aladdin | P141169-1L |

Table 2 Laboratory equipment.

| Equipment | Model | Brand |
| --- | --- | --- |
| LC | Nexera UHPLC LC-30A | SHIMADZU |
| MS | AB Sciex Qtrap 5500 | AB Sciex |
| Chromatographic column | ACQUITY UPLC BEH C18 (100*2.1 mm,1.7 μm) | Waters |
| Centrifuge | TGL-16MS | BIORIDGE |
| Grinder | Wonbio-E | Wonbio |
| Laboratory water bath | HMTD203 | Shanghai KEXI test instrument factory |
| Ultrasonic cleaning machine | F-060SD | Shenzhen Fuyangkeji |

1. **Methods**

**2.1 Metabolites Extraction：**

The fat tissues were added in 300 µL of 50% (v:v) pre-cooled acetonitrile-water solution. Samples were then grinded for 3 min, and extracted by ultrasound instrument in ice-water bath for 10 min. After centrifugation at 12000 rpm for 10 min at 4℃, the supernatant (80 µL) was transferred into a autosampler vial. Next, for sample derivatization, 40 μL of 200 mM 3-NPH and 40 μL of 120 mM EDC-6% pyridine were then added into this autosampler vial and maintained at 40℃ for 30 min. The mixture was allowed to cool on ice for 1 min, the supernatant (160 µL) was collected and then filtered through a 0.22 µm filter and then transferred into a clean autosampler vial. Samples were stored at -80℃. The process of standard derivatization was similar to the process of sample derivatization.

**2.2 GC-MS Analysis：**

For LC process, the chromatographic column was ACQUITY UPLC BEH C18 (100*2.1 mm, 1.7 μm). The injection volume was 1 μL and the flow rate was 0.4 mL/min. The elution procedures were as follows: 0-2 min, 80% A (0.1% formic acid water solution) and 20% B (acetonitrile/methanol 2:1, v/v); 2-8 min, 80-60% A; 8-8.1 min, 60-5% A; 8.1-9.5 min, 5% A; 9.5-9.6 min, 5-80% A; 9.6-10 min A/B, 80% A.

The MS parameters were as follows: negative polarity mode with spray voltage -4500V, column temperature 40°C, ion source temperature 450°C, Gas1 50 (psi), Gas2 50 (psi).
